# Supplementary material
Source: PubMed Central journal article supplement (PMC10494491)
Supplement: NEJMc2216477_appendix.pdf [file NEJMc2216477_appendix.pdf]

## Supplementary Appendix

Supplement to: Krischer JP, Lernmark A, Hagopian WA, et al. SARS-CoV-2 — no increased islet autoimmunity or type 1 diabetes in teens. *N Engl J Med* 2023;389:474-5. DOI: 10.1056/NEJMc2216477

This appendix has been provided by the authors to give readers additional information about the work.

## **Supplementary Appendix - Table of Contents**

|                                                                                    |   |
|------------------------------------------------------------------------------------|---|
| The TEDDY Study Group .....                                                        | 2 |
| Supplementary amplifying text.....                                                 | 5 |
| Table S1. Supplementary Table on the Representativeness of Study Participants..... | 7 |

## The TEDDY Study Group

**Colorado Clinical Center:** Marian Rewers, M.D., Ph.D., PI<sup>1,4,6,9,10</sup>, Kimberly Bautista<sup>11</sup>, Judith Baxter<sup>8,9,11</sup>, Daniel Felipe-Morales, Brigitte I. Frohner, M.D., Ph.D.<sup>2,13</sup>, Marisa Stahl, M.D.<sup>12</sup>, Isabel Flores Garcia, Patricia Gesualdo<sup>2,6,11,13</sup>, Sierra Hays, Michelle Hoffman<sup>11,12,13</sup>, Rachel Karban<sup>11</sup>, Edwin Liu, M.D.<sup>12</sup>, Leila Loaiza Jill Norris, Ph.D.<sup>2,3,11</sup>, Holly O'Donnell, Ph.D.<sup>8</sup>, Loana Thorndahl, Andrea Steck, M.D.<sup>3,13</sup>, Kathleen Waugh<sup>6,7,11</sup>. University of Colorado, Anschutz Medical Campus, Barbara Davis Center for Childhood Diabetes, Aurora, CO, USA.

**Finland Clinical Center:** Jorma Toppari, M.D., Ph.D., PI<sup>¥1,4,10,13</sup>, Olli G. Simell, M.D., Ph.D., Annika Adamsson, Ph.D.<sup>^11</sup>, Suvi Ahonen<sup>\*±§</sup>, Mari Åkerlund<sup>\*±§</sup>, Sirpa Anttila<sup>μ□</sup>, Leena Hakola<sup>\*±</sup>, Anne Hekkala, M.D.<sup>μ□</sup>, Tiia Honkanen<sup>μ□</sup>, Heikki Hyöty, M.D., Ph.D.<sup>\*±6</sup>, Jorma Ilonen, M.D., Ph.D.<sup>¥3</sup>, Sanna Jokipuu<sup>^</sup>, Taru Karjalainen<sup>μ□</sup>, Leena Karlsson<sup>^</sup>, Jukka Kero M.D., Ph.D.<sup>¥^3,13</sup>, Jaakko J. Koskeniemi M.D., Ph.D.<sup>¥^</sup>, Miia Kähönen<sup>μ□11,13</sup>, Mikael Knip, M.D., Ph.D.<sup>\*±</sup>, Minna-Liisa Koivikko<sup>μ□</sup>, Katja Kokkonen<sup>\*±</sup>, Merja Koskinen<sup>\*±</sup>, Mirva Koreasalo<sup>\*±§2</sup>, Kalle Kurppa, M.D., Ph.D.<sup>\*±12</sup>, Salla Kuusela, M.D.<sup>μ□</sup>, Jarita Kytölä<sup>\*±</sup>, Jutta Laiho, Ph.D.<sup>\*6</sup>, Tiina Latva-aho<sup>μ□</sup>, Siiri Leisku<sup>\*±</sup>, Laura Leppänen<sup>^</sup>, Katri Lindfors, Ph.D.<sup>\*12</sup>, Maria Lönnrot, M.D., Ph.D.<sup>\*±6</sup>, Elina Mäntymäki<sup>^</sup>, Markus Mattila<sup>\*±</sup>, Maija Miettinen<sup>§2</sup>, Teija Mykkänen<sup>μ□</sup>, Tiina Niininen<sup>±\*11</sup>, Sari Niinistö<sup>§2</sup>, Noora Nurminen<sup>\*±</sup>, Sami Oikarinen, Ph.D.<sup>\*±6</sup>, Hanna-Leena Oinas<sup>\*±</sup>, Paula Ollikainen<sup>μ□</sup>, Zhian Othmani<sup>¥</sup>, Sirpa Pohjola<sup>μ□</sup>, Solja Raja-Hanhela<sup>μ□</sup>, Jenna Rautanen<sup>±§</sup>, Anne Riikonen<sup>\*±§2</sup>, Minna Romo<sup>^</sup>, Juulia Rönkä<sup>μ□</sup>, Nelli Rönkä<sup>μ□</sup>, Satu Simell, M.D., Ph.D.<sup>¥12</sup>, Päivi Tossavainen, M.D.<sup>μ□</sup>, Mari Vähä-Mäkilä<sup>¥</sup>, Eeva Varjonen<sup>^11</sup>, Riitta Veijola, M.D., Ph.D.<sup>μ□13</sup>, Irene Viinikangas<sup>μ□</sup>, Silja Vilmi<sup>μ□</sup>, Suvi M. Virtanen, M.D., Ph.D.<sup>\*±§2</sup>.  
¥University of Turku, Turku, Finland, \*Tampere University, Tampere, Finland, μUniversity of Oulu, Oulu, Finland, ^Turku University Hospital, Hospital District of Southwest Finland, Turku, Finland, ±Tampere University Hospital, Tampere, Finland, □Oulu University Hospital, Oulu, Finland, §Finnish Institute for Health and Welfare, Helsinki, Finland.

**Georgia/Florida Clinical Center:** Richard McIndoe, Ph.D., PI<sup>^4,10</sup>, Desmond Schatz, M.D.<sup>\*4,7,8</sup>, Diane Hopkins<sup>^11</sup>, Michael Haller, M.D.<sup>\*13</sup>, Risa Bernard<sup>^11</sup>, Melissa Gardiner<sup>^11</sup>, Ashok Sharma, Ph.D.<sup>^</sup>, Laura Jacobsen, M.D.<sup>\*13</sup>, Jennifer Hosford<sup>^</sup>, Kennedy Petty<sup>^</sup>, Leah Myers<sup>^</sup>, Chelsea Salmon<sup>\*</sup>. ^Center for Biotechnology and Genomic Medicine, Augusta University, Augusta, GA, USA. \*University of Florida, Pediatric Endocrinology, Gainesville, FL, USA.

**Germany Clinical Center:** Anette G. Ziegler, M.D., PI<sup>1,3,4,10</sup>, Ezio Bonifacio Ph.D.<sup>\*</sup>, Cigdem Gezginci, Willi Grätz, Anja Heublein, Eva Hohoff<sup>¥2</sup>, Sandra Hummel, Ph.D.<sup>2</sup>, Annette Knopff<sup>7</sup>, Melanie Köger, Sibylle Koletzko, M.D.<sup>¶12</sup>, Claudia Ramminger<sup>11</sup>, Roswith Roth, Ph.D.<sup>8</sup>, Jennifer Schmidt, Marlon Scholz, Joanna Stock<sup>8,11,13</sup>, Katharina Warncke, M.D.<sup>13</sup>, Lorena Wendel, Christiane Winkler, Ph.D.<sup>2,11</sup>. Forschergruppe Diabetes e.V. and Institute of Diabetes Research, Helmholtz Zentrum München, Forschergruppe Diabetes, and Klinikum rechts der Isar, Technische Universität München, Neuherberg, Germany. \*Center for Regenerative Therapies, TU Dresden, Dresden, Germany, ¶Dr. von Hauner Children's Hospital, Department of Gastroenterology, Ludwig Maximilians University Munich, Munich, Germany, ¥University of Bonn, Department of Nutritional Epidemiology, Bonn, Germany.

**Sweden Clinical Center:** Åke Lernmark, Ph.D., PI<sup>1,3,4,5,6,8,9,10</sup>, Daniel Agardh, M.D., Ph.D.<sup>6,12</sup>, Carin Andrén Aronsson, Ph.D.<sup>2,11,12</sup>, Rasmus Bennet, Corrado Cilio, Ph.D., M.D.<sup>6</sup>, Susanne Dahlberg, Ulla Fält, Malin Goldman Tsubarah, Emelie Ericson-Hallström, Lina Fransson, Emina Halilovic, Gunilla Holmén, Susanne Hyberg, Berglind Jonsdottir, M.D., Ph.D.<sup>11</sup>, Naghmeh Karimi, Helena Elding Larsson, M.D., Ph.D.<sup>6,13</sup>, Marielle Lindström, Markus Lundgren, M.D., Ph.D.<sup>13</sup>, Marlena Maziarz, Ph.D., Jessica Melin<sup>11</sup>, Caroline Nilsson, Kobra Rahmati, Anita Ramelius, Falastin Salami, Ph.D., Anette Sjöberg, Evelyn Tekum Amboh Carina Törn, Ph.D.<sup>3</sup>, Ulrika Ulvenhag, Terese Wiktorsson, Åsa Wimar<sup>13</sup>. Lund University, Lund, Sweden.

**Washington Clinical Center:** William A. Hagopian, M.D., Ph.D., PI<sup>1,3,4,6,7,10,12,13</sup>, Michael Killian<sup>6,7,11,12</sup>, Claire Cowen Crouch<sup>11,13</sup>, Jennifer Skidmore<sup>2</sup>, Trevor Bender, Megan Llewellyn, Cody McCall, Arlene Meyer, Jocelyn Meyer, Denise Mulenga 11, Nole Powell, Jared Radtke, Shreya Roy, Preston Tucker. Pacific Northwest Research Institute, Seattle, WA, USA.

**Pennsylvania Satellite Center:** Dorothy Becker, M.D., Margaret Franciscus, MaryEllen Dalmagro-Elias Smith<sup>2</sup>, Ashi Daftary, M.D., Mary Beth Klein, Chrystal Yates. Children's Hospital of Pittsburgh of UPMC, Pittsburgh, PA, USA.

**Data Coordinating Center:** Jeffrey P. Krischer, Ph.D., PI<sup>1,4,5,9,10</sup>, Rajesh Adusumali, Sarah Austin-Gonzalez, Maryouri Avendano, Sandra Baethke, Brant Burkhardt, Ph.D.<sup>6</sup>, Martha Butterworth<sup>2</sup>, Nicholas Cadigan, Joanna Clasen, Kevin Counts, Laura Gandolfo, Jennifer Garmeson, Veena Gowda, Christina Karges, Shu Liu, Xiang Liu, Ph.D.<sup>2,3,8,13</sup>, Kristian Lynch, Ph.D.<sup>6,8</sup>, Jamie Malloy, Lazarus Mramba, Ph.D.<sup>2</sup>, Cristina McCarthy<sup>11</sup>, Jose Moreno, Hemang M. Parikh, Ph.D.<sup>3,8</sup>, Cassandra Remedios, Chris Shaffer, Susan Smith<sup>11</sup>, Noah Sulman, Ph.D., Roy Tamura, Ph.D.<sup>1,2,11,12,13</sup>, Dena Tewey, Henri Thuma, Michael Toth, Ulla Uusitalo, Ph.D.<sup>2</sup>, Kendra Vehik, Ph.D.<sup>4,5,6,8,13</sup>, Ponni Vijayakandipan, Melissa Wroble, Jimin Yang, Ph.D., R.D.<sup>2</sup>, Kenneth Young, Ph.D. *Past staff: Michael Abbondandolo, Lori Ballard, Rasheedah Brown, David Cuthbertson, Stephen Dankyi, Christopher Eberhard, Steven Fiske, David Hadley, Ph.D., Kathleen Heyman, Belinda Hsiao, Francisco Perez Laras, Hye-Seung Lee, Ph.D., Qian Li, Ph.D., Colleen Maguire, Wendy McLeod, Aubrie Merrell, Steven Meulemans, Ryan Quigley, Laura Smith, Ph.D.* University of South Florida, Tampa, FL, USA.

**Autoantibody Reference Laboratories:** Liping Yu, M.D.<sup>^5</sup>, Dongmei Miao, M.D.<sup>^</sup>, Kathleen Gillespie<sup>\*5</sup>, Kyla Chandler\*, Ilana Kelland\*, Yassin Ben Khoud\*, Matthew Randell \*. <sup>^</sup>Barbara Davis Center for Childhood Diabetes, University of Colorado Denver, \*Bristol Medical School, University of Bristol, UK.

**COVID-19 Autoantibody Laboratory:** Michael Kalnoski, M.D., Chao-Nan Ting, Ph.D. Atlas Genomics, Seattle, WA, USA.

**HLA Reference Laboratory:** William Hagopian<sup>3</sup>, M.D., Ph.D., Jared Radtke, Preston Tucker. Pacific Northwest Research Institute, Seattle, WA, USA. (Previously Henry Erlich, Ph.D.<sup>3</sup>, Steven J. Mack, Ph.D., Anna Lisa Fear. Center for Genetics, Children's Hospital Oakland Research Institute.)

**Repository:** Chris Deigan. NIDDK Biosample Repository at Fisher BioServices, Rockville, MD, USA. (Previously Ricky Schrock, Polina Malone, Sandra Ke, Niveen Mulholland, Ph.D.)

**Project scientist:** Beena Akolkar, Ph.D.<sup>1,3,4,5,6,7,9,10</sup>. National Institutes of Diabetes and Digestive and Kidney Diseases, Bethesda, MD, USA.

**Other contributors:** Thomas Briese, Ph.D.<sup>6</sup>, Columbia University. Todd Brusko, Ph.D.<sup>5</sup>, University of Florida, Gainesville, FL, USA. Teresa Buckner, Ph.D.<sup>2</sup>, University of Northern Colorado, Greeley, CO. Suzanne Bennett Johnson, Ph.D.<sup>8,11</sup>, Florida State University, Tallahassee, FL, USA. Eoin McKinney, Ph.D.<sup>5</sup>, University of Cambridge, Cambridge, UK. Tomi Pastinen, M.D., Ph.D.<sup>5</sup>, The Children's Mercy Hospital, Kansas City, MO, USA. Steffen Ullitz Thorsen, M.D., Ph.D.<sup>2</sup>, Department of Clinical Immunology, University of Copenhagen, Copenhagen, Denmark, and Department of Pediatrics and Adolescents, Copenhagen University Hospital, Herlev, Denmark. Eric Triplett, Ph.D.<sup>6</sup>, University of Florida, Gainesville, FL, USA.

***Committees:***

<sup>1</sup>Ancillary Studies, <sup>2</sup>Diet, <sup>3</sup>Genetics, <sup>4</sup>Human Subjects/Publicity/Publications, <sup>5</sup>Immune Markers, <sup>6</sup>Infectious Agents, <sup>7</sup>Laboratory Implementation, <sup>8</sup>Psychosocial, <sup>9</sup>Quality Assurance, <sup>10</sup>Steering, <sup>11</sup>Study Coordinators, <sup>12</sup>Celiac Disease, <sup>13</sup>Clinical Implementation.

## Supplementary amplifying text

The observations reported herein cover the period of time synonymous with many reported increases in the incidence of type 1 diabetes comparing the pre- to pandemic periods. Virtually none of these included any systematic testing for the presence of the SARS-CoV-2 virus. While the virus may have mutated during this period, we continue to believe that the presence of nucleocapsid antibodies remain a valid indicator for SARS-CoV-2 infection and that spike antibodies, in the absence of nucleocapsid antibodies, are a valid indicator of vaccination. We did not intend to distinguish between different variants. In addition, the small number of infections and subsequent cases of islet autoantibody positivity in our study population would preclude an analysis of individual variants.

The study population consists of children enrolled and followed by the TEDDY study, which collects extensive data on possible diabetes-related risk factors, including past infections. Children were enrolled by 3 months of age from 2004-2009 from sites located in four countries: the U.S. (3712), Finland (1833), Germany (594), and Sweden (2528). The cumulative loss to follow-up rate is 31% (22-37% over the four countries). Data collection includes parent reporting of clinical infection and analysis of stool (viral shedding) and blood (antibodies) collected longitudinally which should detect clinical and subclinical exposures. While we cannot rule out the occurrence of antibodies that subsequently declined below detectable levels, the frequent sampling interval (3 months for those who were islet autoantibody positive and 6 months otherwise) would suggest that this is not the case.

TEDDY continues to follow this population and tests for islet autoantibodies after infection. We cannot rule out that autoantibodies might appear years after infection. But we deliberately matched the time periods reported in the literature – that is, the literature cited makes reference to the year before the pandemic and the first year of the pandemic. We show that the increase in the number of cases is not related to infection. We can speculate as to whether heightened surveillance or changes in access to care may have accounted for this observation. In our study, T1D and SARS-CoV-2 surveillance were uniform over the pre-pandemic and pandemic time periods.

Islet autoantibodies and SARS-CoV-2 antibodies were all measured centrally. Autoantibodies to insulin (IAA), glutamic acid decarboxylase (GADA), insulinoma antigen-2 (IA-2A), or zinc transporter 8 (ZnT8A) were measured in two laboratories by radio binding assays. In the U.S., all sera were assayed at the Barbara Davis Center for Childhood Diabetes at the University of Colorado Denver; in Europe, all sera were assayed at the University of Bristol, U.K. Both laboratories followed the same protocol which demonstrated high sensitivity and specificity as well as concordance. All positive islet autoantibody samples and 5% of the negative samples were re-tested in the other reference laboratory and deemed confirmed if concordant. This study only reports confirmed results.

COVID-19 antibodies were tested by Atlas Genomics, Seattle, Washington, using the Meso Scale Discovery (MSD) Assay V-PLEX SARS-CoV-2 Panel 2 (IgG) to measure IgG antibodies to the nucleocapsid (N) and spike (S) antigens. IgG antibodies to the nucleocapsid protein of the

virus were used to determine prior exposure to SARS-CoV-2 (infection) and IgG antibodies to the spike protein (not N) were used to determine prior vaccination. A sample positive for both N and S antibodies were interpreted as prior infection.

We chose to avoid issues of adjustment for multiple testing by reporting point estimates and 95% confidence intervals. The confidence intervals were calculated using exact methods.

**Table S1. Supplementary Table on the Representativeness of Study Participants**

| <b>Category</b>                                                                         | <b>Example</b>                                                                                                                                                                                                  |
|-----------------------------------------------------------------------------------------|-----------------------------------------------------------------------------------------------------------------------------------------------------------------------------------------------------------------|
| Disease, problem, or condition under investigation<br>Special considerations related to | The incidence of diabetes related autoimmunity and type 1 diabetes in a prospective cohort study of individuals at elevated type 1 diabetes genetic risk.                                                       |
| Sex and gender                                                                          | The incidence of diabetes related autoimmunity is 30% higher among males, but the incidence of type 1 diabetes is 40% less as compared to females in a genetically at-risk population.                          |
| Age                                                                                     | The incidence of autoimmunity peaks under 5 years of age and the incidence of diabetes rises until 5 years of age, after which the incidence of both remains fairly constant through the second decade of life. |
| Race or ethnic group                                                                    | Type 1 diabetes affects Hispanic and Black persons disproportionately. They are underrepresented in this study cohort.                                                                                          |
| Geography                                                                               | There are country differences in the incidence of type 1 diabetes. This study cohort addressed that by enrolling those with high genetic risk.                                                                  |
