# Supplementary material
Source: PubMed Central journal article supplement (PMC10494491)
Supplement: NEJMc2216477_disclosures.pdf [file NEJMc2216477_disclosures.pdf]

Beena akolkar

**Discloser Identifier:** 700233

**Disclosure Purpose:** 22-16477

## Summary of Interests

I do not have any interests to disclose at this time.

## Additional Questions

1. **Are there other relationships or activities that readers could perceive to have influenced, or that give the appearance of potentially influencing, what you wrote in the submitted work?**

No.

2. **What is the manuscript title?**

SARS-CoV-2 - No Increased Islet Autoimmunity or Type 1 Diabetes in Teens

3. **Are you the corresponding author?**

No.

## Certification

I certify that the information provided in this disclosure is complete and accurate.

# WILLIAM HAGOPIAN

Discloser Identifier: 559345

Disclosure Purpose: 22-16477

## Summary of Interests

### Company or Organization

| Entity                                                                                                                                                                                                                                                          | Type             | Interest Held By |
|-----------------------------------------------------------------------------------------------------------------------------------------------------------------------------------------------------------------------------------------------------------------|------------------|------------------|
| Provention Bio                                                                                                                                                                                                                                                  | Grant / Contract | Self             |
| <b>Recipient Name:</b> William Hagopian <b>Recipient Type:</b> Institution<br><b>Grant / Contract Description:</b> support for CASCADE Study to predict type 1 diabetes in children <b>Grant / Contract Purpose:</b> Research<br><b>Additional Information:</b> |                  |                  |
| SANOPI PASTEUR INC.                                                                                                                                                                                                                                             | Consultant       | Self             |
| <b>Category:</b> Consultant<br><b>Description:</b> consultant for early stage type 1 diabetes registry<br><b>Additional Information:</b> just 6 hours involvement so far                                                                                        |                  |                  |

## Additional Questions

1. **Are there other relationships or activities that readers could perceive to have influenced, or that give the appearance of potentially influencing, what you wrote in the submitted work?**

No.

2. **What is the manuscript title?**

SARS-CoV-2 -- No Increased Islet Autoimmunity or Type 1 Diabetes in Teens

3. **Are you the corresponding author?**

No.

## Certification

I certify that the information provided in this disclosure is complete and accurate.

**Discloser Identifier:** 377593**Disclosure Purpose:** 22-16477

## Summary of Interests

I do not have any interests to disclose at this time.

## Additional Questions

1. **Are there other relationships or activities that readers could perceive to have influenced, or that give the appearance of potentially influencing, what you wrote in the submitted work?**

No.

2. **What is the manuscript title?**

A Lack of Evidence that SARS-COV-2 Infection Promotes an Increased Risk of Islet Autoimmunity or type 1 diabetes in Adolescents: the TEDDY Study

3. **Are you the corresponding author?**

Yes.

- a. **Please list the other authors' names here.**

Åke Lernmark, Ph.D., William A. Hagopian, M.D., Ph.D., Marian J. Rewers, M.D., Ph.D., Richard McIndoe, Ph.D., Jorma Toppari, M.D., Ph.D., Anette-G. Ziegler, M.D., Beena Akolkar, Ph.D., on behalf of the TEDDY Study Group\*

## Certification

I certify that the information provided in this disclosure is complete and accurate.

Discloser Identifier: 385018

Disclosure Purpose: 22-16477

## Summary of Interests

### Company or Organization

| Entity                                                                                                                                                                                                                                                                                                                                             | Type                       | Interest Held By |
|----------------------------------------------------------------------------------------------------------------------------------------------------------------------------------------------------------------------------------------------------------------------------------------------------------------------------------------------------|----------------------------|------------------|
| Diamyd Medical AB                                                                                                                                                                                                                                                                                                                                  | Data And Safety Monitoring | Self             |
| <p><b>Category:</b> Data And Safety Monitoring<br/> <b>Description:</b> Treatment of Respiratory complications associated with Covid-19 infection using Wharton's Jelly (WJ)- Umbilical Cord (UC) mesenchymal stromal cells (PorTrans): open Phase 1B clinical trial; EudraCT number: 2020-002078-29<br/> <b>Additional Information:</b></p>       |                            |                  |
| Diamyd Medical AB                                                                                                                                                                                                                                                                                                                                  | Consultant                 | Self             |
| <p><b>Category:</b> Consultant<br/> <b>Description:</b> Internal core competences constitute Diamyd Medical's core employees in collaboration with a global network of clinics, researchers and production units. Further expertise, including analysis- and laboratory services are contracted as needed.<br/> <b>Additional Information:</b></p> |                            |                  |

### Intellectual Property

| Type                                                                                                                                                                                                                                                                                                                                          | Is Licensed | Interest Held By |
|-----------------------------------------------------------------------------------------------------------------------------------------------------------------------------------------------------------------------------------------------------------------------------------------------------------------------------------------------|-------------|------------------|
| Patent - Cloning and expression of human islet glutamic ac                                                                                                                                                                                                                                                                                    | -           | Self             |
| <p><b>Description:</b> Cloning and expression of human islet glutamic acid decarboxylase autoantigen. 6,025,176.<br/> <b>Patent Status:</b> Issued<br/> <b>Filing Jurisdiction:</b> USA<br/> <b>Licensees:</b><br/> <b>Additional Information:</b></p> <p><b>Patent Number:</b> 6,025,176<br/> <b>Patent Holder:</b> Previous Institution</p> |             |                  |
| Patent - Diagnosis of Insulin-dependent diabetes.                                                                                                                                                                                                                                                                                             | -           | Self             |
| <p><b>Description:</b> Diagnosis of Insulin-dependent diabetes.<br/> <b>Patent Status:</b> Issued<br/> <b>Filing Jurisdiction:</b> USA<br/> <b>Licensees:</b><br/> <b>Additional Information:</b></p> <p><b>Patent Number:</b> 5,547,847<br/> <b>Patent Holder:</b> Previous Institution</p>                                                  |             |                  |
| Patent - Methods for determination of tissue types coded b                                                                                                                                                                                                                                                                                    | -           | Self             |
| <p><b>Description:</b> Methods for determination of tissue types coded by MHC genes.<br/> <b>Patent Status:</b> Issued<br/> <b>Filing Jurisdiction:</b> EU<br/> <b>Licensees:</b><br/> <b>Additional Information:</b></p> <p><b>Patent Number:</b> Patent EP 0103 000 B1<br/> <b>Patent Holder:</b> Discloser</p>                             |             |                  |
| Patent - Cloning and expression of human islet glutamic ac                                                                                                                                                                                                                                                                                    | -           | Self             |

| Type                                                                                                                                                                                                                         | Is Licensed                                                                                                              | Interest Held By |
|------------------------------------------------------------------------------------------------------------------------------------------------------------------------------------------------------------------------------|--------------------------------------------------------------------------------------------------------------------------|------------------|
| <b>Description:</b> Cloning and expression of human islet glutamic acid decarboxylase autoantigen.<br><b>Patent Status:</b> Issued<br><b>Filing Jurisdiction:</b> USA<br><b>Licensees:</b><br><b>Additional Information:</b> | <b>Patent Number:</b> 5, 792,620<br><b>Patent Holder:</b> Other Organization - Dedicated to the public on April 24, 2000 |                  |
| Patent - Modified glutamic acid decarboxylase (GAD).                                                                                                                                                                         | -                                                                                                                        | Self             |
| <b>Description:</b> Modified glutamic acid decarboxylase (GAD).<br><b>Patent Status:</b> Issued<br><b>Filing Jurisdiction:</b> USA<br><b>Licensees:</b><br><b>Additional Information:</b>                                    | <b>Patent Number:</b> 6,093,396<br><b>Patent Holder:</b> Other Organization - DiaMyd Medical AB, Stockholm, Sweden       |                  |

## Additional Questions

1. **Are there other relationships or activities that readers could perceive to have influenced, or that give the appearance of potentially influencing, what you wrote in the submitted work?**

No.

2. **What is the manuscript title?**

SARS-CoV-2 - No Increased Islet Autoimmunity or Type 1 Diabetes in Teens

3. **Are you the corresponding author?**

No.

## Certification

I certify that the information provided in this disclosure is complete and accurate.

Richard McIndoe

**Discloser Identifier:** 1107711

**Disclosure Purpose:** 22-16477

## Summary of Interests

I do not have any interests to disclose at this time.

## Additional Questions

1. **Are there other relationships or activities that readers could perceive to have influenced, or that give the appearance of potentially influencing, what you wrote in the submitted work?**

No.

2. **What is the manuscript title?**

SARS-CoV-2 -- No Increased Islet Autoimmunity or Type 1 Diabetes in Teens

3. **Are you the corresponding author?**

No.

## Certification

I certify that the information provided in this disclosure is complete and accurate.

Discloser Identifier: 1054771

Disclosure Purpose: 22-16477

## Summary of Interests

### Company or Organization

| Entity                                                                                                                                                                                                                                                                                                                                                                                                                                                                                                                                              | Type       | Interest Held By |
|-----------------------------------------------------------------------------------------------------------------------------------------------------------------------------------------------------------------------------------------------------------------------------------------------------------------------------------------------------------------------------------------------------------------------------------------------------------------------------------------------------------------------------------------------------|------------|------------------|
| Janssen Research and Development                                                                                                                                                                                                                                                                                                                                                                                                                                                                                                                    | Consultant | Self             |
| <b>Category:</b> Consultant<br><b>Description:</b> Paid to University Colorado Medicine<br><b>Additional Information:</b> Provide inputs into predictive tool for T1D screening, including, but not limited to: generation and use of predictive models of T1D risk using genetic risk scores, combined risk scores, demographics, morphometrics and medical history, organ-specific autoantibodies, and measurement methods for the above parameters. □ Attend discussions and provide data and data sources to input into the T1D screening tool. |            |                  |
| Provention Bio                                                                                                                                                                                                                                                                                                                                                                                                                                                                                                                                      | Consultant | Self             |
| <b>Category:</b> Consultant<br><b>Description:</b> Paid to University Colorado Medicine<br><b>Additional Information:</b> National Virtual Advisory Board                                                                                                                                                                                                                                                                                                                                                                                           |            |                  |
| SANOFI US SERVICES INC.                                                                                                                                                                                                                                                                                                                                                                                                                                                                                                                             | Consultant | Self             |
| <b>Category:</b> Consultant<br><b>Description:</b> Screening the Landscape of T1D, paid to University Colorado Medicine<br><b>Additional Information:</b>                                                                                                                                                                                                                                                                                                                                                                                           |            |                  |

## Additional Questions

1. **Are there other relationships or activities that readers could perceive to have influenced, or that give the appearance of potentially influencing, what you wrote in the submitted work?**

No.

2. **What is the manuscript title?**

SARS-CoV-2 -- No Increased Islet Autoimmunity or Type 1 Diabetes in Teens

3. **Are you the corresponding author?**

No.

## Certification

I certify that the information provided in this disclosure is complete and accurate.





Jorma Toppari

**Discloser Identifier:** 5059

**Disclosure Purpose:** 22-16477

## Summary of Interests

### Company or Organization

| Entity                                                                                                                               | Type                       | Interest Held By |
|--------------------------------------------------------------------------------------------------------------------------------------|----------------------------|------------------|
| Diamyd Medical                                                                                                                       | Data And Safety Monitoring | Self             |
| <b>Category:</b> Data And Safety Monitoring<br><b>Description:</b> DSMB member of Diagnode-3 trial<br><b>Additional Information:</b> |                            |                  |

## Additional Questions

1. **Are there other relationships or activities that readers could perceive to have influenced, or that give the appearance of potentially influencing, what you wrote in the submitted work?**

No.

2. **What is the manuscript title?**

SARS-CoV-2 -- No Increased Islet Autoimmunity or Type 1 Diabetes in Teens

3. **Are you the corresponding author?**

No.

## Certification

I certify that the information provided in this disclosure is complete and accurate.

xAnette-Gabriele Ziegler

**Discloser Identifier:** 468203

**Disclosure Purpose:** 22-16477

## Summary of Interests

I do not have any interests to disclose at this time.

## Additional Questions

1. **Are there other relationships or activities that readers could perceive to have influenced, or that give the appearance of potentially influencing, what you wrote in the submitted work?**

No.

2. **What is the manuscript title?**

SARS-CoV-2 - No Increased Islet Autoimmunity or Type 1 Diabetes in Teens

3. **Are you the corresponding author?**

No.

## Certification

I certify that the information provided in this disclosure is complete and accurate.
